# Supplementary material
Source: publisher figshare collection journal article supplement (https://karger.figshare.com/articles/dataset/_/5123935)
Supplement: Supplementary file 2 [file 1 › 000342243_sm_Appendix.pdf]

**Appendix.** Search strategy used for MEDLINE.

Limits: English, Humans, all adults (19 +), published between 31st of December 1993 and May 2012.

1. (stage AND psychiatric disorder) OR staging AND psychiatric disorder
2. (stage AND mental disorder) OR staging AND mental disorder
3. (stage AND schizophrenia) OR staging AND schizophrenia
4. (stage AND mood disorder) OR staging AND mood disorder
5. (stage AND anxiety disorder) OR staging AND anxiety disorder
6. (stage AND substance use disorder) OR staging AND substance use disorder
7. (stage AND eating disorder) OR staging AND eating disorder
