# Supplementary material
Source: publisher figshare collection journal article supplement (https://karger.figshare.com/articles/dataset/_/5123935)

**Figure 1.** Flow diagram of the search.

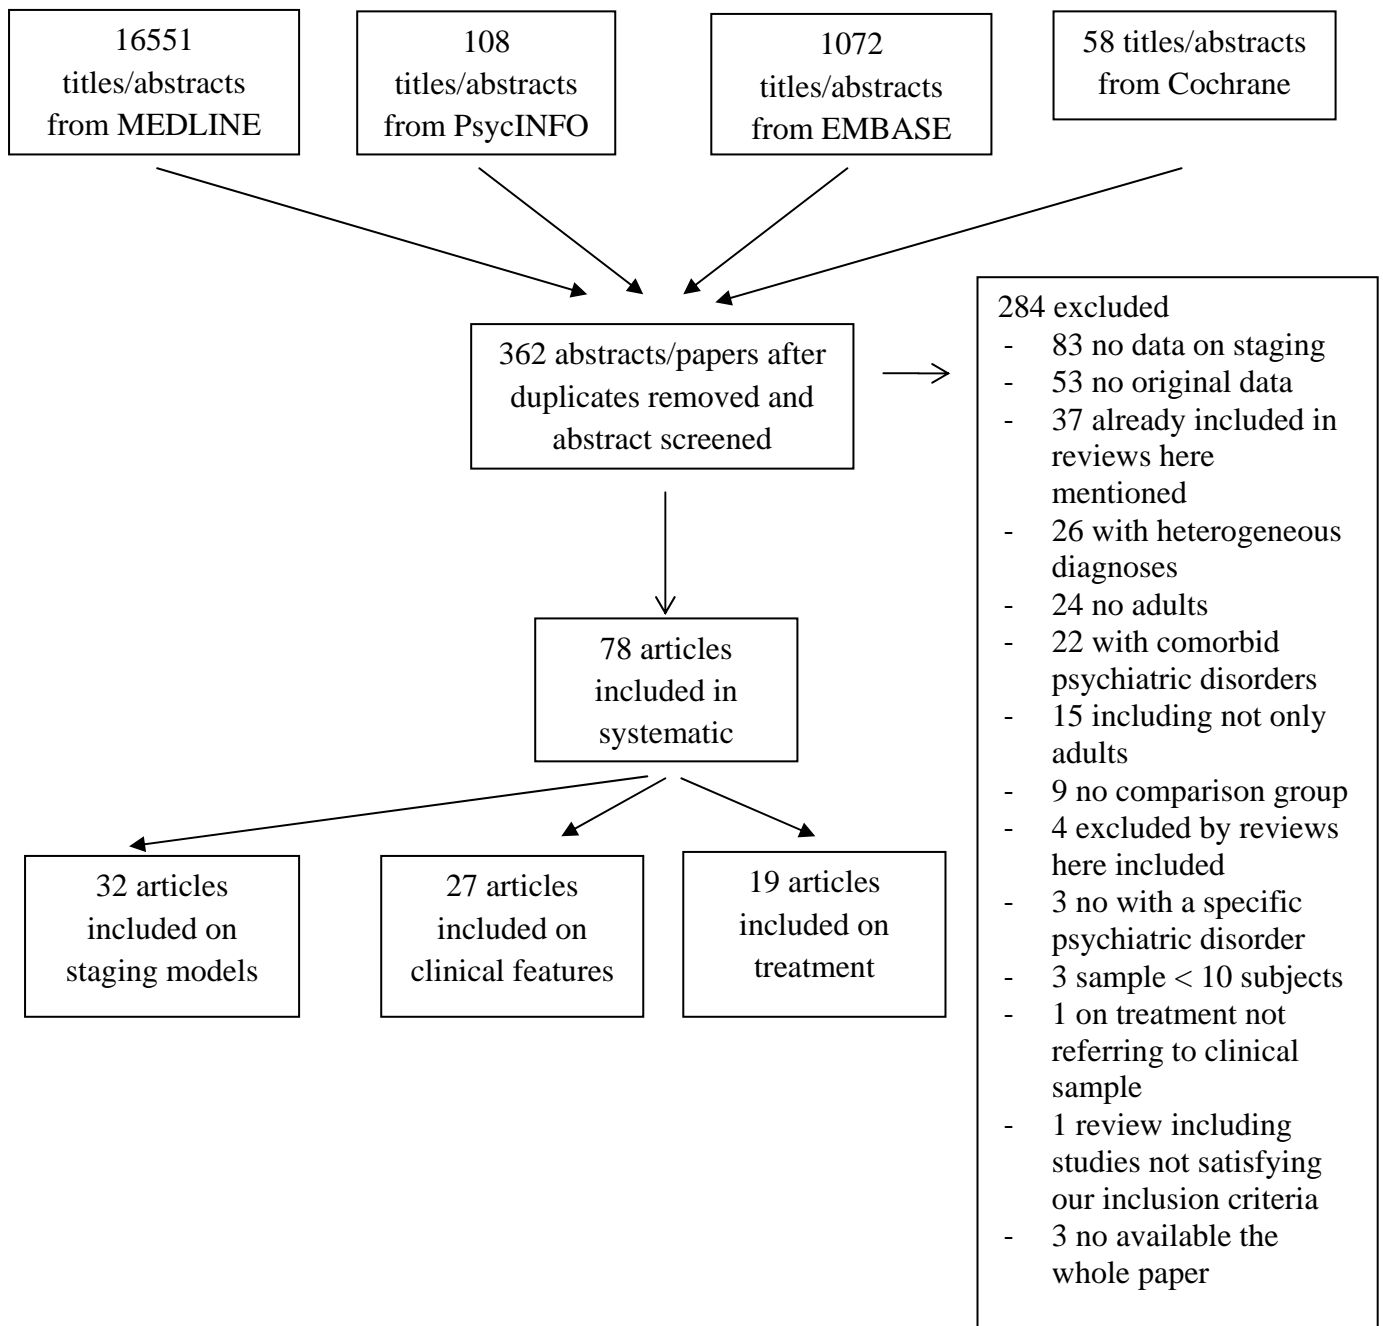

Supplement: Supplementary file 1 [file 1]
